# Supplementary material
Source: publisher figshare collection journal article supplement (https://gsajournals.figshare.com/ndownloader/files/28889850)
Supplement: Supplementary file 1 [file 28889850]

**Supplemental Table S2:** Connectivity of phenotypic categories.

| Phenotypes                          | Phenotypes        |                   |                     |             |                  |          |                              |                  |                    |
|-------------------------------------|-------------------|-------------------|---------------------|-------------|------------------|----------|------------------------------|------------------|--------------------|
|                                     | Paired Nuclei     | 1-cell multi-nuc. | ≥ 2 cell Multi nuc. | Micronuclei | Anaphase bridges | Deformed | Abnormal NE NPC distribution | Cytoplasmic NPCs | Intra nuclear NPCs |
| <b>Paired nuclei</b>                | (50) <sup>a</sup> |                   |                     |             |                  |          |                              |                  |                    |
| <b>1-cell Multi-nucleated</b>       | 1 <sup>b</sup>    | (13)              |                     |             |                  |          |                              |                  |                    |
| <b>≥ 2 cell Multi nucleated</b>     | 32                | 0                 | (106)               |             |                  |          |                              |                  |                    |
| <b>Micronuclei</b>                  | 12                | 4                 | 36                  | (54)        |                  |          |                              |                  |                    |
| <b>Anaphase bridges</b>             | 11                | 0                 | 20                  | 18          | (33)             |          |                              |                  |                    |
| <b>Deformed</b>                     | 26                | 9                 | 71                  | 40          | 18               | (104)    |                              |                  |                    |
| <b>Abnormal NE NPC distribution</b> | 3                 | 0                 | 7                   | 4           | 4                | 9        | (27)                         |                  |                    |
| <b>Cytoplasmic NPCs</b>             | 3                 | 0                 | 7                   | 3           | 3                | 10       | 3                            | (13)             |                    |
| <b>Intra-nuclear NPCs</b>           | 1                 | 0                 | 2                   | 0           | 0                | 2        | 0                            | 0                | (2)                |

<sup>a</sup> Numbers in parentheses in grey boxes indicate the total number of RNAi that resulted in the indicated phenotype.

<sup>b</sup> Numbers indicate the number of RNAi that resulted in the indicated two phenotypes (note that additional phenotypes are also possible).
